# Supplementary material for: An Electrostatic Pest Exclusion Strategy for Greenhouse Tomato Cultivation
Source: MDPI journal article supplement (doi:10.3390/horticulturae8060543), 2022-06-18
Supplement: s1 [file s1]

**Figure S1**

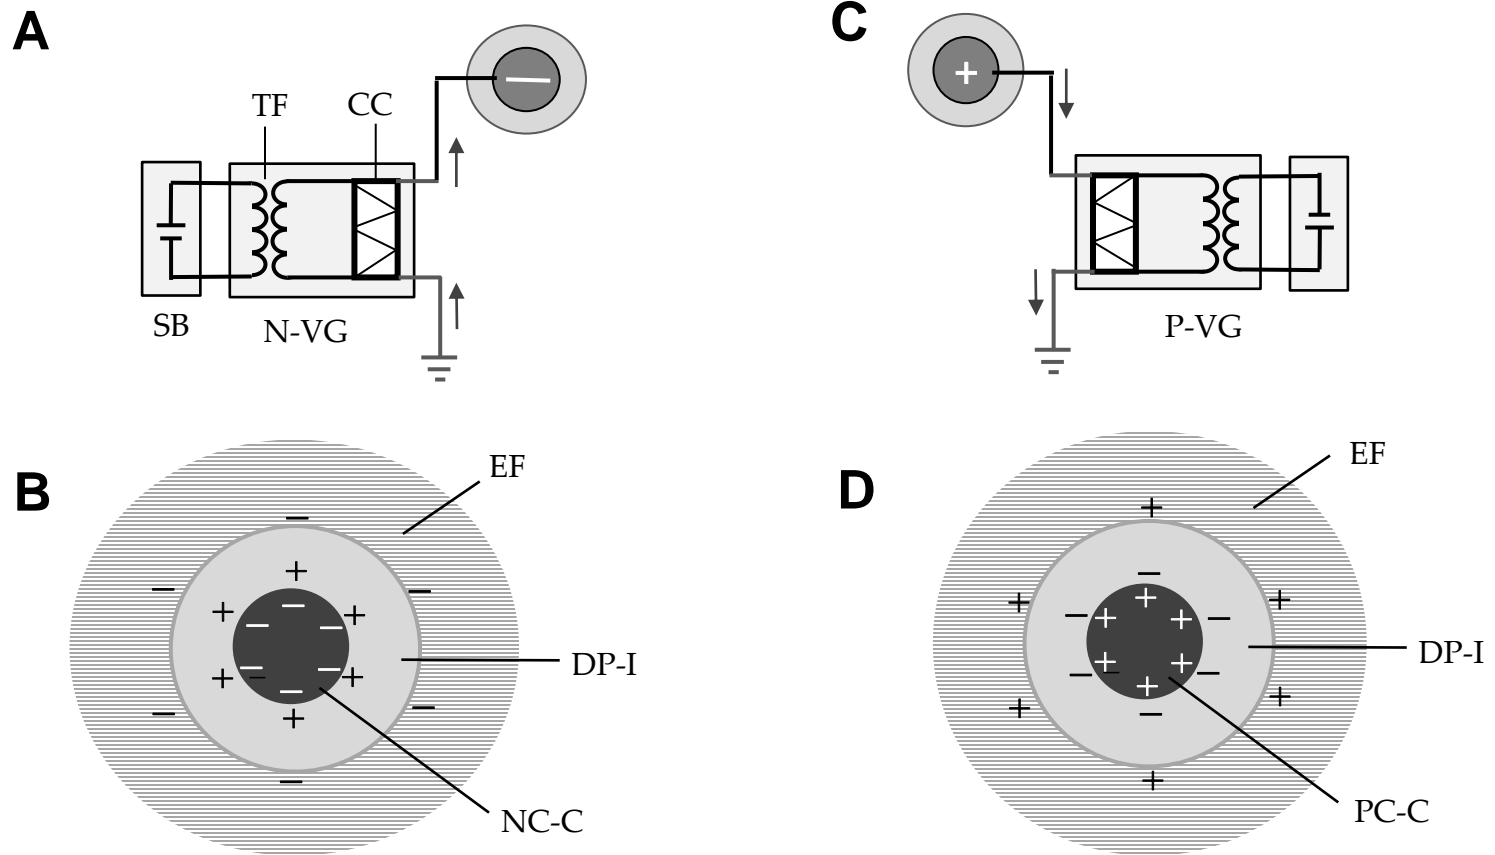

**Figure S1.** (A, C) Schematic representation of negative (A) and positive (C) voltage generators used for negative and positive charging of an insulated conductor (iron wire), respectively. (B, D) Schematic representation of dielectric polarization of an insulated conductor charged negatively (B) or positively (D). Arrow indicates the direction of movement of negative electricity or free electrons. TF, transformer; CC, Cockcroft circuit; SB, storage battery; N-VG, negative voltage generator; P-VG, positive voltage generator; EF, electric field; DP-I, dielectrically polarized insulator; NC-C, negatively charged conductor; PC-C, positively charged conductor.
