# Supplementary material for: An Electrostatic Pest Exclusion Strategy for Greenhouse Tomato Cultivation
Source: MDPI journal article supplement (doi:10.3390/horticulturae8060543), 2022-06-18
Supplement: s1 [file s1]

**Figure S2**

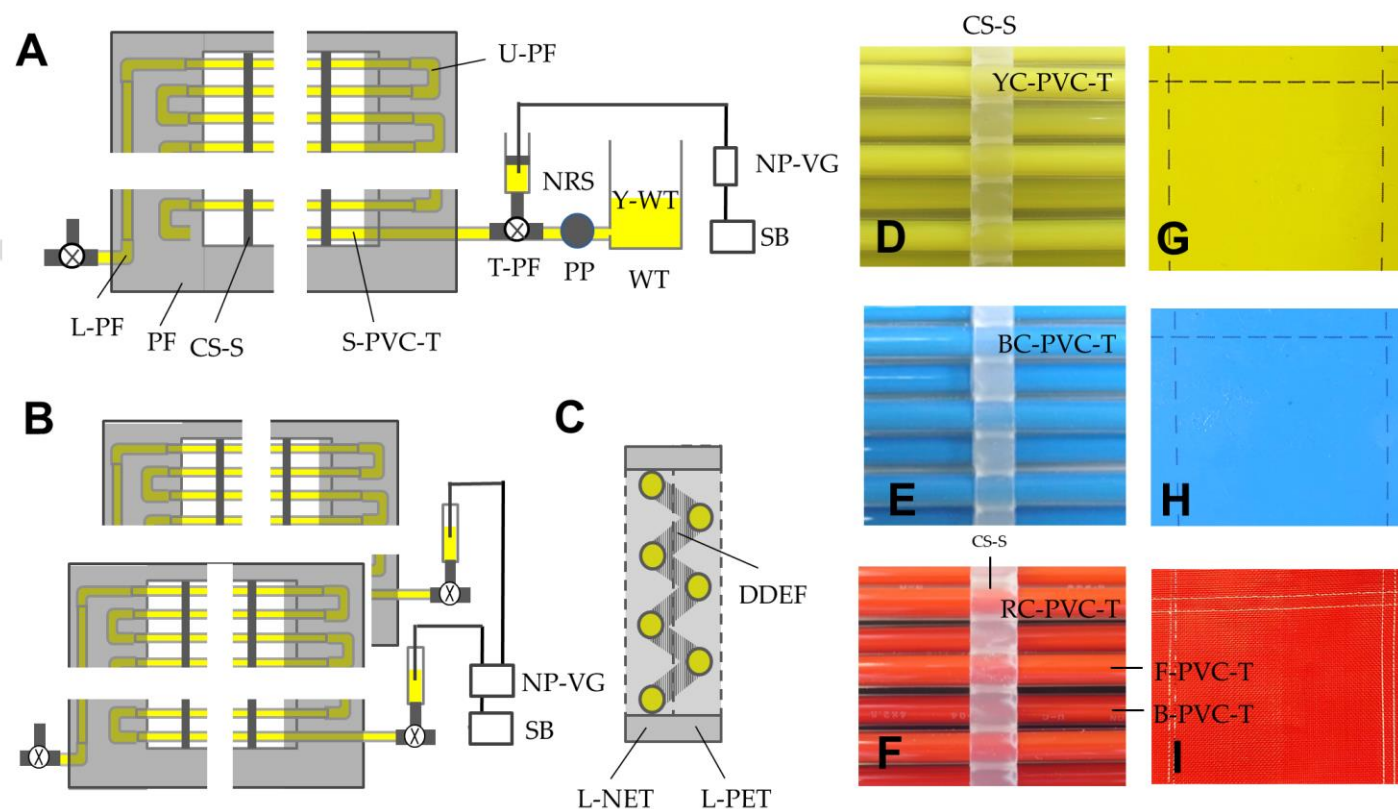

**Figure S2.** Structure of colored DD screens consisting of paired PVC tubes filled with colored water and oppositely charged. (A) A layer of soft PVC tubes electrified with negatively or positively charged yellow water. (B) Two layers of soft PVC tubes oppositely electrified with charged water. (C) Construction of the DDEF, which was constructed by coupling two layers of soft PVC tubes that had been oppositely electrified (cross-sectional view). (D–I) Comparison of hue/value/chroma-based coloration among transparent soft PVC tubes containing (D) yellow, (E) blue, and (F) red water and commercially available (G) yellow and (H) blue sticky traps or (I) a red insect-proof net. L-PF, L-shaped pipe fitting; PF, polypropylene frame; CS-S, comb-shaped polypropylene spacer; PVC-T, polyvinyl chloride tube; U-PF, U-shaped pipe fitting; NRS, needle-removed syringe; T-PF, T-shaped pipe fitting; WT, water tank; PP, peristaltic pump; Y-WT, yellow water; NP-VG, negative and positive voltage generator; SB, storage battery; L-NET, layer of negatively electrified tubes; L-PET, layer of positively electrified tubes; DDEF, double-charged dipolar electric field; YC-, BC-, and RC-PVC-T, transparent PVC tube containing yellow, blue, and red water, respectively; F- and B-PVC-T, front and back PVC tubes in a paired tube layer, respectively [10].
